# Supplementary material for: Simultaneous determination of noble metals (Rh, Pd, Ir, Pt, and Au) in environmental samples by nebulized film dielectric barrier discharge vapor generation coupled with inductively coupled plasma mass spectrometry
Source: Royal Society of Chemistry journal article supplement (doi:10.1039/d0ja00343c), 2020-01-01
Supplement: d0ja00343c1.pdf [file d0ja00343c1.pdf]

## Supplementary Information

### **Simultaneously determination of noble metals (Rh, Pd, Ir, Pt, and Au) in environmental sample by nebulized film dielectric barrier discharge vapor generation coupled with inductively coupled plasma mass spectrometry**

Qian He,<sup>1\*</sup> Xianxian Wang,<sup>2</sup> Huijun He,<sup>1</sup> Jing Zhang<sup>3\*</sup>

<sup>1</sup>*Key Lab of Marine Chemistry Theory & Technology, Ministry Education, Ocean University of China, Qingdao 266100, China*

<sup>2</sup>*College of Chemistry and Chemical Engineering, Ocean University of China, Qingdao, 266100, China*

<sup>3</sup>*Earth and Environmental System, Graduate School of Science and Engineering, University of Toyama, Toyama 930-8555, Japan*

\*Corresponding author email: [heqian@ouc.edu.cn](mailto:heqian@ouc.edu.cn); [jzhang@sci.u-toyama.ac.jp](mailto:jzhang@sci.u-toyama.ac.jp)

## Table of Contents

The pretreatment process of sediment sample.

Fig. S1 The setup of NFDBD vapor generation coupled with ICP-MS for noble metal determination. (GLS: gas-liquid separator)

Fig. S2 Comparison of the integrated response of  $1 \text{ mg L}^{-1}$  Na and K in 2% nitric acid by FI-NFDBD sampling system between DBD plasma off and on and adding with formic acid (7%) when DBD plasma was off. Each point is the average from three measurements ( $n = 3$ ). Error bars are defined as  $\pm\text{SD}$ .

Fig. S3 Effect of different organic acid species (formic acid, acetic acid and propionic acid) with the same concentration of 7% mixed with nitric acid (2%) on the integrated response of Rh, Pd, Ir, Pt, and Au ( $5 \text{ }\mu\text{g L}^{-1}$ ) by FI-NFDBD sampling system. Each point is the average from three measurements ( $n = 3$ ). Error bars are defined as  $\pm\text{SD}$ .

Fig. S4 Comparison of the integrated response for Rh, Pd, Ir, Pt, and Au ( $5 \text{ }\mu\text{g L}^{-1}$ ) in 2% nitric acid with and without formic acid (7%) by FI-NFDBD sampling system with DBD plasma off. Each point is the average from three measurements ( $n = 3$ ). Error bars are defined as  $\pm\text{SD}$ .

Fig. S5 Calibration curve of Rh, Pd, Ir, Pt, and Au in FI-NFDBD-ICP-MS system with the concentrations between  $0.005$  to  $10 \text{ }\mu\text{g L}^{-1}$ . The inset shows the calibration curve with the concentrations between  $0.005$  to  $0.1 \text{ }\mu\text{g L}^{-1}$ . Each point is the average from three measurements ( $n = 3$ ). Error bars are defined as  $\pm\text{SD}$ .

Fig. S6 Correlation of FI-NFDBD-ICP-MS method and FI-conventional nebulization-ICP-MS method for analysis of Rh, Pd, Ir, Pt, and Au in the same sediment sample.

Table S1 The recoveries of Rh, Pd, Ir, Pt, and Au ( $5 \mu\text{g L}^{-1}$ ) with different matrix by FI-NFDBD sampling system.

Table S2 The LODs of noble metals determination by different vapor generation methods.

### **The pretreatment process of sediment sample**

The sediment sample needed some digestion steps before analysis. The digestion steps were as follows: 1) 80 mg sediment sample was dissolved with a mix acid of 5 mL HF, 2 mL HNO<sub>3</sub> and 1 mL HClO<sub>4</sub> in a PTFE digester at 60°C, 90°C, 120°C and 150°C step by step on a hot plate for 2 h; 2) subsequently, 5 mL HF and 2 mL HNO<sub>3</sub> were added to the PTFE digester again under the heat process same to step 1) and further at 180°C for continuous digestion for 24 h; 3) next, the sample solution was cooled to room temperature and dried at 120°C; 4) then, the above steps 1) -3) were repeated once; 5) next, 3 mL HClO<sub>4</sub> was added to the digester three times (1 mL per time) to remove HF at 130°C; 6) finally, the sample residue was completely dissolved in 30 mL 2% nitric acid and filtered with 0.45 μm polyethersulfone membrane before analysis.

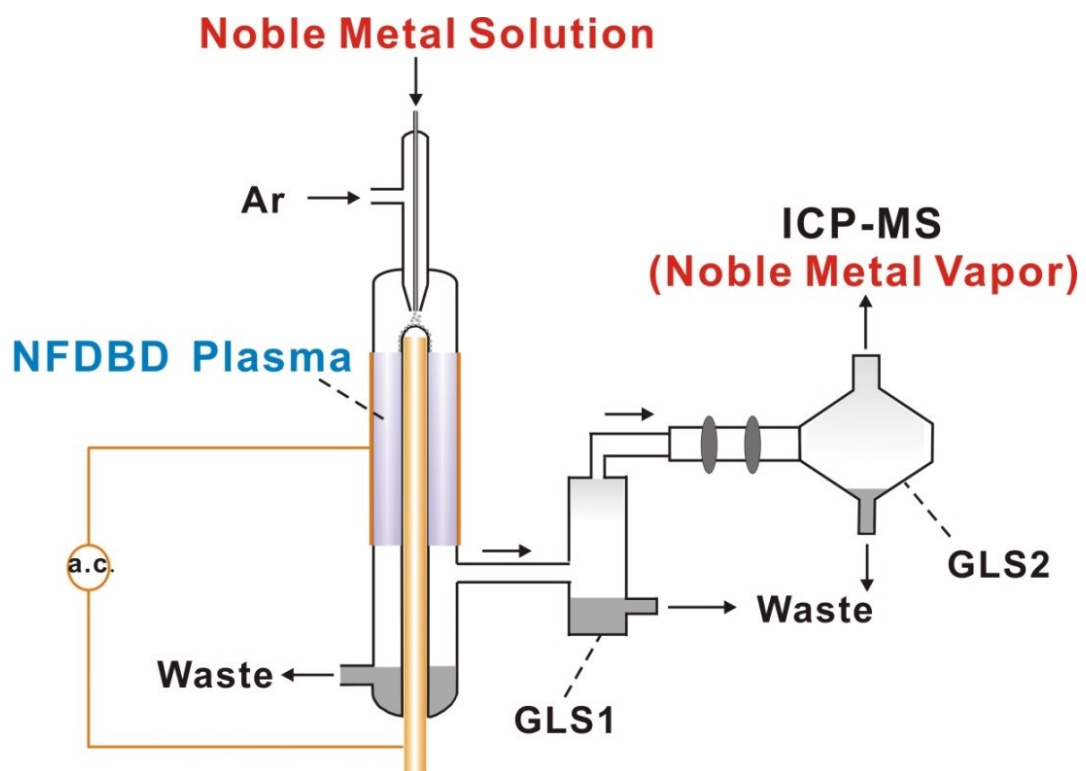

Fig. S1 The setup of NFDBD vapor generation coupled with ICP-MS for noble metal determination. (GLS: gas-liquid separator)

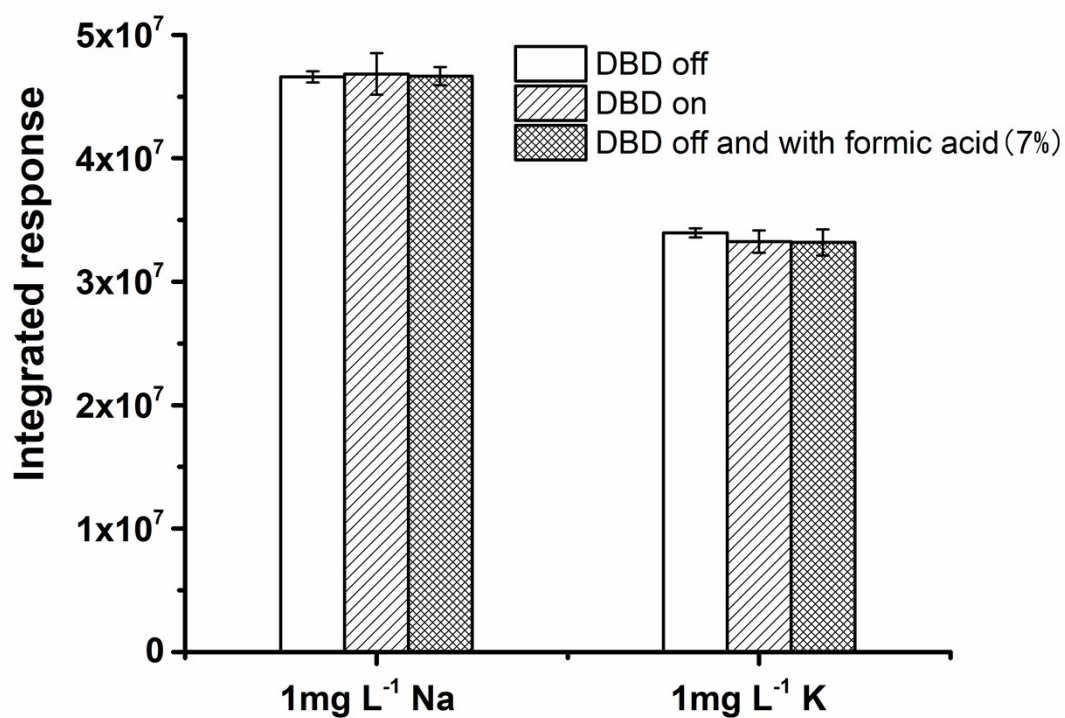

Fig. S2 Comparison of the integrated response of 1 mg L<sup>-1</sup> Na and K in 2% nitric acid by FI-NFDBD sampling system between DBD plasma off and on and adding with formic acid (7%) when DBD plasma was off. Each point is the average from three measurements (n = 3). Error bars are defined as ±SD.

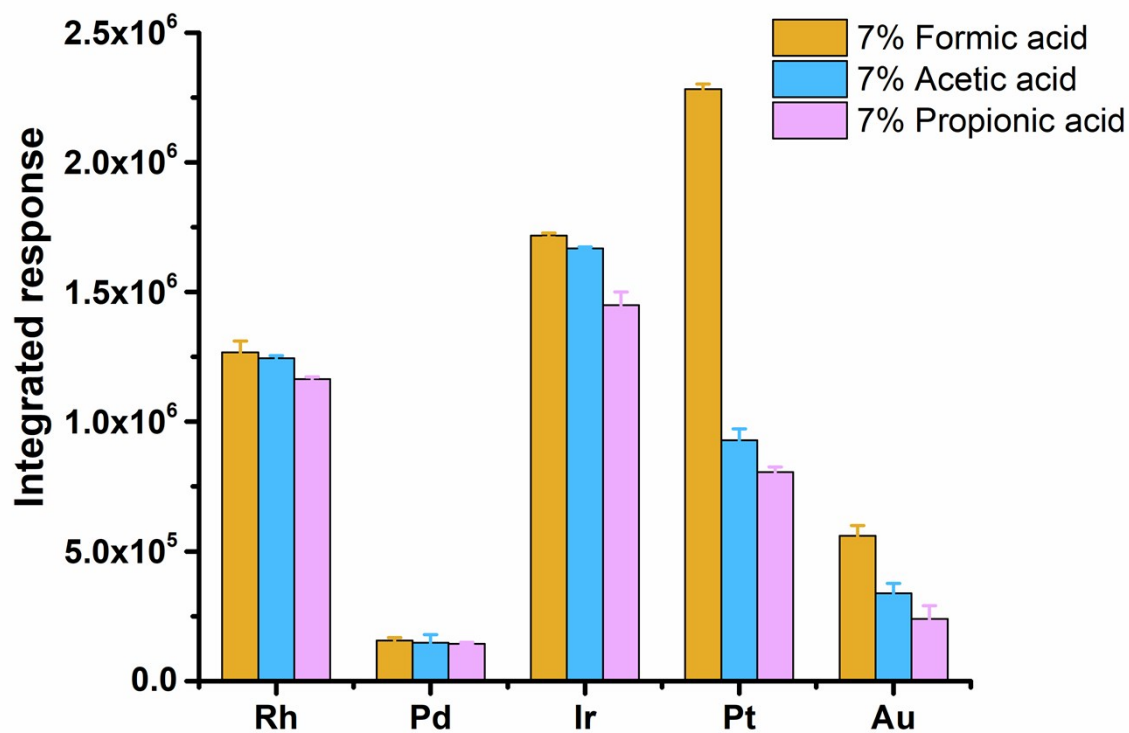

Fig. S3 Effect of different organic acid species (formic acid, acetic acid and propionic acid) with the same concentration of 7% mixed with nitric acid (2%) on the integrated response of Rh, Pd, Ir, Pt, and Au ( $5 \mu\text{g L}^{-1}$ ) by FI-NFDBD sampling system. Each point is the average from three measurements ( $n = 3$ ). Error bars are defined as  $\pm\text{SD}$ .

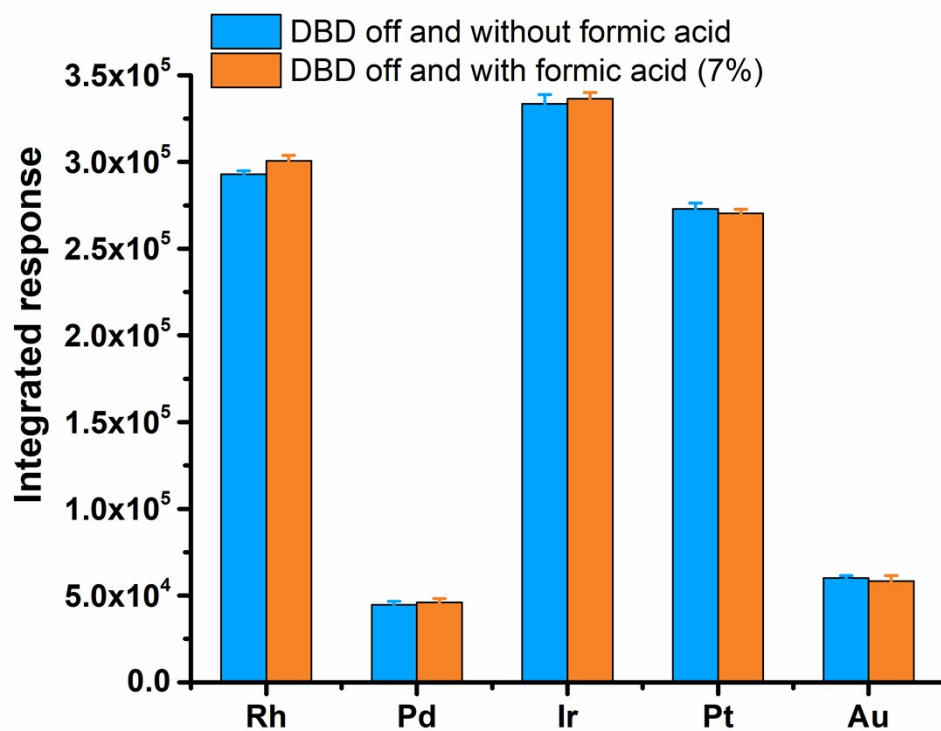

Fig. S4 Comparison of the integrated response for Rh, Pd, Ir, Pt, and Au ( $5 \mu\text{g L}^{-1}$ ) in 2% nitric acid with and without formic acid (7%) by FI-NFDBD sampling system with DBD plasma off. Each point is the average from three measurements ( $n = 3$ ). Error bars are defined as  $\pm\text{SD}$ .



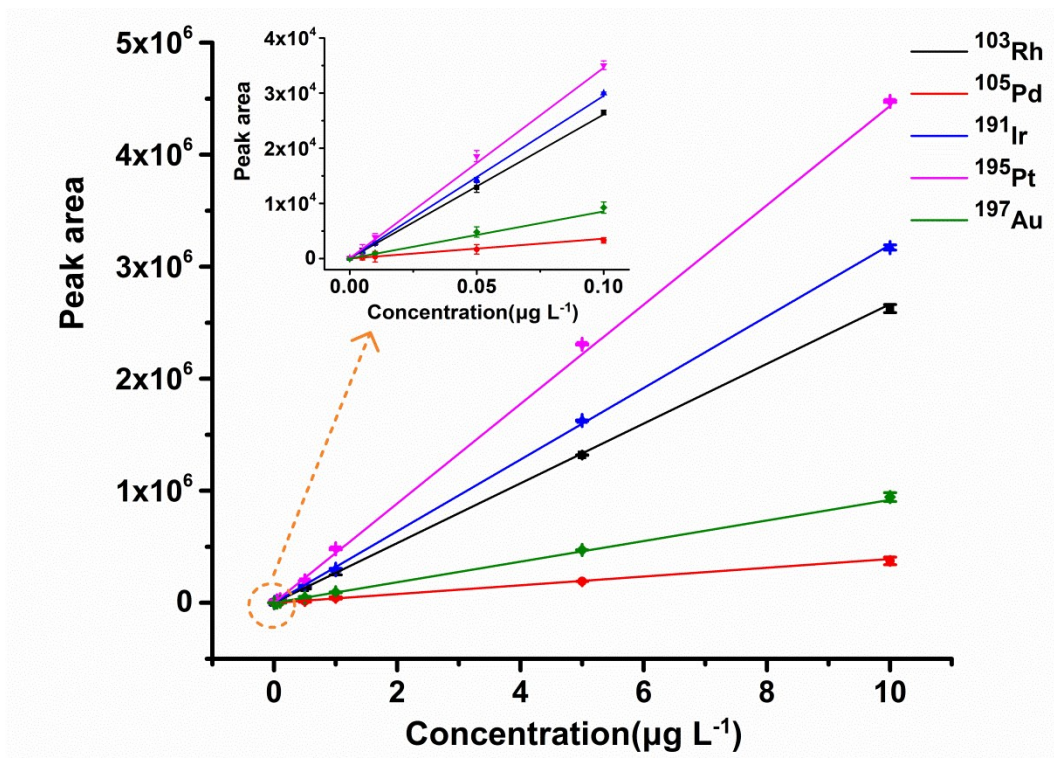

Fig. S5 Calibration curve of Rh, Pd, Ir, Pt, and Au in FI-NFDBD-ICP-MS system with the concentrations between 0.005 to 10  $\mu\text{g L}^{-1}$ . The inset shows the calibration curve with the concentrations between 0.005 to 0.1  $\mu\text{g L}^{-1}$ . Each point is the average from three measurements ( $n = 3$ ). Error bars are defined as  $\pm\text{SD}$ .

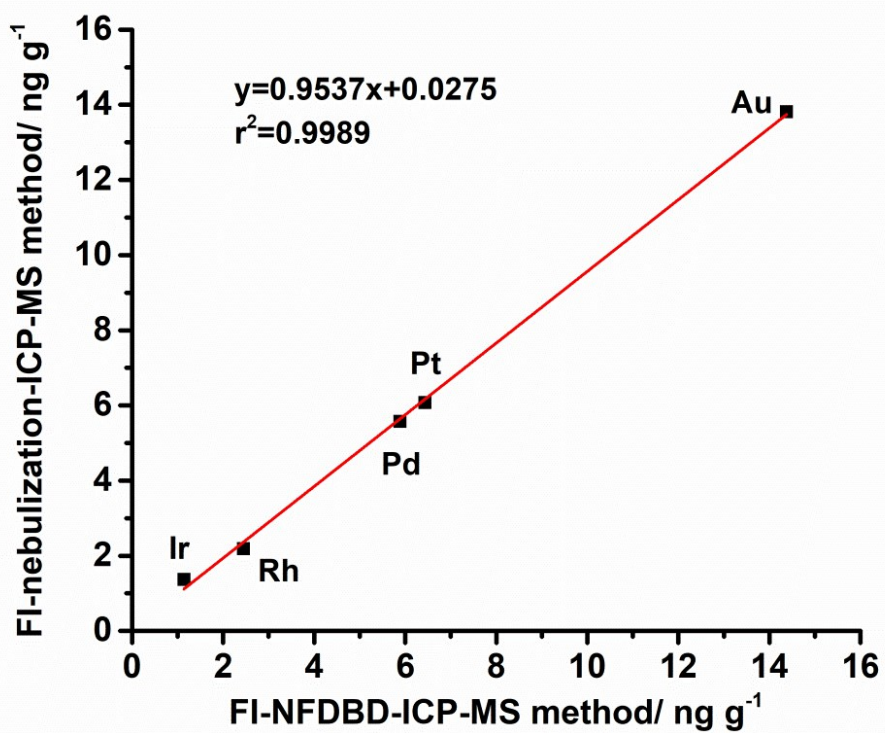

Fig. S6 Correlation of FI-NFDBD-ICP-MS method and FI-conventional nebulization-ICP-MS method for analysis of Rh, Pd, Ir, Pt, and Au in the same sediment sample.

Table S1 The recoveries of Rh, Pd, Ir, Pt, and Au ( $5 \mu\text{g L}^{-1}$ ) with different matrix by FI-NFDBD sampling system.

| Matrix                                          | Concentration<br>( $\text{mg L}^{-1}$ ) | Recovery (%) |           |           |           |           |
|-------------------------------------------------|-----------------------------------------|--------------|-----------|-----------|-----------|-----------|
|                                                 |                                         | Rh           | Pd        | Ir        | Pt        | Au        |
| NaCl                                            | 100                                     | 102.1±0.4    | 92.9±2.5  | 97.7±4.3  | 97.8±0.4  | 100.0±0.4 |
| KCl                                             | 100                                     | 107.0±1.5    | 91.1±3.2  | 98.1±3.0  | 96.8±0.3  | 99.8±1.9  |
| CaCl <sub>2</sub>                               | 100                                     | 102.2±2.8    | 98.5±0.8  | 98.1±2.9  | 91.6±3.7  | 92.6±0.1  |
| MgCl <sub>2</sub>                               | 100                                     | 102.5±2.7    | 97.9±2.6  | 101.3±0.7 | 92.9±0.2  | 93.7±0.2  |
| Cu(NO <sub>3</sub> ) <sub>2</sub>               | 100                                     | 101.3±1.3    | 97.9±0.3  | 91.2±1.1  | 90.8±0.3  | 100.2±0.4 |
| NiCl <sub>2</sub>                               | 10                                      | 103.5±4.5    | 90.4±2.1  | 102.1±3.9 | 91.9±0.2  | 99.6±0.3  |
| Co(NO <sub>3</sub> ) <sub>2</sub>               | 10                                      | 102.4±4.5    | 93.5±2.3  | 100.1±3.5 | 96.3±0.3  | 100.3±0.4 |
| Zn(NO <sub>3</sub> ) <sub>2</sub>               | 10                                      | 100.4±2.3    | 91.7±1.2  | 92.0±1.9  | 102.3±0.3 | 96.7±0.2  |
| Fe <sub>2</sub> (SO <sub>4</sub> ) <sub>3</sub> | 10                                      | 108.4±3.2    | 92.3±3.3  | 106.1±1.7 | 95.5±0.2  | 96.8±0.4  |
| CdCl <sub>2</sub>                               | 10                                      | 100.5±0.7    | 99.7±0.9  | 101.3±3.4 | 102.5±1.7 | 99.5±2.8  |
| Pb(NO <sub>3</sub> ) <sub>2</sub>               | 10                                      | 100.3±4.6    | 100.8±0.3 | 100.2±1.2 | 94.5±1.9  | 98.5±0.5  |
| AgNO <sub>3</sub>                               | 10                                      | 100.2±0.2    | 99.8±2.1  | 100.2±2.4 | 102.2±1.9 | 98.5±3.1  |
| ZrCl <sub>4</sub>                               | 10                                      | 102.3±1.1    | 98.3±2.1  | 98.1±0.3  | 100.2±2.4 | 99.3±0.7  |
| SrCl <sub>2</sub>                               | 10                                      | 104.4±2.9    | 99.6±0.1  | 97.8±3.2  | 97.1±2.7  | 102.5±2.1 |
| YCl <sub>3</sub>                                | 10                                      | 97.3±0.8     | 99.9±3.4  | 100.2±2.3 | 98.5±0.2  | 96.5±0.7  |
| HfCl <sub>4</sub>                               | 0.01                                    | 102.3±1.2    | 99.8±0.3  | 100.2±1.7 | 97.6±2.8  | 101.4±0.7 |
| LuCl <sub>3</sub>                               | 0.01                                    | 104.4±2.5    | 93.5±0.3  | 97.7±3.3  | 102.4±0.3 | 99.5±0.4  |

Table S2 The LODs of noble metals determination by different vapor generation methods.

| Vapor generation method                         | Detection method                    | LOD (ng L <sup>-1</sup> ) |      |      |      |        | Ref       |
|-------------------------------------------------|-------------------------------------|---------------------------|------|------|------|--------|-----------|
|                                                 |                                     | Rh                        | Pd   | Ir   | Pt   | Au     |           |
| NaBH <sub>4</sub> in acid solution              | AAS                                 | —                         | —    | —    | —    | 766000 | 1         |
| NaBH <sub>4</sub> in acid solution with DDTC    | AAS                                 | —                         | —    | —    | —    | 24000  | 2         |
| KBH <sub>4</sub> in acid solution with RTIL     | AFS                                 | —                         | —    | —    | —    | 6300   | 3         |
| NaBH <sub>4</sub> in acid solution              | MIP-OES with ultrasonic nebulizers  | 1800                      | 1100 | —    | 2900 | 1200   | 4         |
| NaBH <sub>4</sub> in acid solution              | ICP-OES with solid phase extraction | —                         | 3670 | —    | 20   | —      | 5         |
| NaBH <sub>4</sub> in acid solution              | ICP-OES with solid phase extraction | 100000                    | 1500 | 570  | 30   | 620    | 6         |
| Photochemical vapor generation with formic acid | ICP-MS                              | 20                        | 100  | 20   | 80   | 70     | 7         |
| NFDBD vapor generation with formic acid         | ICP-MS                              | 0.34                      | 0.65 | 0.26 | 0.11 | 0.50   | This work |

## References

- 1 A. S. Luna, R. E. Sturgeon and R. C. de Campos, *Anal. Chem.*, 2000, **72**, 3523-3531.
- 2 X. G. Du and S. K. Xu, *Fresen. J. Anal. Chem.*, 2001, **370**, 1065-1070.
- 3 C. Zhang, Y. Li, X.-Y. Cui, Y. Jiang and X.-P. Yan, *J. Anal. At. Spectrom.*, 2008, **23**, 1372-1377.
- 4 H. Matusiewicz and M. Ślachciński, *J. Anal. At. Spectrom.*, 2010, **25**, 1324-1333.
- 5 M. M. López Guerrero, E. Vereda Alonso, J. M. Cano Pavón, M. T. Siles Cordero and A. García de Torres, *J. Anal. At. Spectrom.*, 2016, **31**, 975-984.
- 6 M. M. López Guerrero, E. Vereda Alonso, A. García de Torres and J. M. Cano Pavón, *J. Anal. At. Spectrom.*, 2017, **32**, 2281-2291.
- 7 R. M. de Oliveira and D. L. G. Borges, *J. Anal. At. Spectrom.*, 2018, **33**, 1700-1706.
